# Supplementary material for: Hybrid 2D Supramolecular Organic Frameworks (SOFs) Assembled by the Cooperative Action of Hydrogen and Halogen Bonding and π⋯π Stacking Interactions
Source: MDPI journal article supplement (doi:10.3390/ijms25042062), 2024-02-08
Supplement: s1 [file s1]

## Electronic Supporting Information

### Hybrid 2D Supramolecular Organic Frameworks (SOFs) Assembled by the Cooperative Action of Hydrogen and Halogen Bonding and $\pi\cdots\pi$ Stacking Interactions

Sergey V. Baykov,<sup>a</sup> Artem V. Semenov,<sup>a</sup> Sofia I. Presnukhina,<sup>a</sup> Marina V. Tarasenko,<sup>b</sup> Anton A. Shetnev,<sup>b</sup> Antonio Frontera,<sup>c</sup> Vadim P. Boyarskiy,<sup>a,\*</sup> Vadim Yu. Kukushkin<sup>a,d</sup>

<sup>a</sup>*Institute of Chemistry, Saint Petersburg State University, 7/9 Universitetskaya Nab., 199034 Saint Petersburg, Russian Federation*

<sup>b</sup>*Pharmaceutical Technology Transfer Center, Ushinsky Yaroslavl State Pedagogical University, 108 Respublikanskaya St., 150000 Yaroslavl, Russian Federation*

<sup>c</sup>*Departament de Química, Universitat de les Illes Balears, Crta de Valldemossa km 7.5, 07122 Palma de Mallorca (Balears), Spain*

<sup>d</sup>*Institute of Chemistry and Pharmaceutical Technologies, Altai State University, 656049 Barnaul, Russian Federation*

## Table of Contents

|                                                                                                                                       |   |
|---------------------------------------------------------------------------------------------------------------------------------------|---|
| S1. X-ray diffraction data .....                                                                                                      | 3 |
| S2. Copies of the NMR spectra of <i>cis</i> - <b>A</b> and <i>trans</i> - <b>A</b> .....                                              | 5 |
| S3. Noncovalent interactions in the structure of <i>trans</i> - <b>A</b> .....                                                        | 7 |
| S4. Void channels in structures of <i>cis</i> - <b>A</b> ·½(1,2-DBE) and <i>cis</i> - <b>A</b> ·½C <sub>6</sub> H <sub>14</sub> ..... | 8 |

## S1. X-ray diffraction data

**Table S1.** Crystal data and structure refinement parameters for cocrystals *cis*-A·½(1,2-DCE) and *cis*-A·½(1,2-DBE).

|                                              |                                                                               |                                                                                 |
|----------------------------------------------|-------------------------------------------------------------------------------|---------------------------------------------------------------------------------|
| Structure                                    | <i>cis</i> -A·½(1,2-DCE)                                                      | <i>cis</i> -A·½(1,2-DBE)                                                        |
| Identification code                          | BSC-231                                                                       | BSC-240                                                                         |
| CCDC number                                  | 2314868                                                                       | 2314869                                                                         |
| Empirical formula                            | C <sub>16</sub> H <sub>14</sub> Cl <sub>3</sub> N <sub>2</sub> O <sub>3</sub> | C <sub>16</sub> H <sub>14</sub> BrCl <sub>2</sub> N <sub>2</sub> O <sub>3</sub> |
| Formula weight                               | 388.64                                                                        | 433.10                                                                          |
| Temperature, K                               | 100(2)                                                                        | 100(2)                                                                          |
| Crystal system                               | triclinic                                                                     | triclinic                                                                       |
| Space group                                  | P-1                                                                           | P-1                                                                             |
| a, Å                                         | 6.9888(3)                                                                     | 7.0698(5)                                                                       |
| b, Å                                         | 11.6332(6)                                                                    | 11.6573(7)                                                                      |
| c, Å                                         | 12.0134(6)                                                                    | 11.9914(7)                                                                      |
| α, °                                         | 66.054(5)                                                                     | 65.626(5)                                                                       |
| β, °                                         | 75.188(4)                                                                     | 75.012(5)                                                                       |
| γ, °                                         | 76.989(4)                                                                     | 76.789(5)                                                                       |
| Volume, Å <sup>3</sup>                       | 854.80(8)                                                                     | 861.19(10)                                                                      |
| Z                                            | 2                                                                             | 2                                                                               |
| ρ <sub>calc</sub> , cm <sup>3</sup>          | 1.510                                                                         | 1.670                                                                           |
| μ, mm <sup>-1</sup>                          | 0.553                                                                         | 6.267                                                                           |
| F(000)                                       | 398.0                                                                         | 434.0                                                                           |
| Crystal size, mm <sup>3</sup>                | 0.22 × 0.17 × 0.15                                                            | 0.21 × 0.18 × 0.16                                                              |
| Radiation                                    | Mo Kα (λ = 0.71073)                                                           | Cu Kα (λ = 1.54184)                                                             |
| 2θ range for data collection, °              | 6.088 to 64.674                                                               | 8.238 to 152.13                                                                 |
| Index ranges                                 | −10 ≤ h ≤ 10,<br>−17 ≤ k ≤ 17,<br>−17 ≤ l ≤ 17                                | −8 ≤ h ≤ 6,<br>−14 ≤ k ≤ 14,<br>−14 ≤ l ≤ 14                                    |
| Reflections collected                        | 18152                                                                         | 6270                                                                            |
| Independent reflections                      | 5484 [R <sub>int</sub> = 0.0269,<br>R <sub>sigma</sub> = 0.0316]              | 3492 [R <sub>int</sub> = 0.0329,<br>R <sub>sigma</sub> = 0.0318]                |
| Data/restraints/parameters                   | 5484/0/218                                                                    | 3492/0/218                                                                      |
| Goodness-of-fit on F <sup>2</sup>            | 1.048                                                                         | 1.049                                                                           |
| Final R indexes [I ≥ 2σ (I)]                 | R <sub>1</sub> = 0.0446,<br>wR <sub>2</sub> = 0.1130                          | R <sub>1</sub> = 0.0436,<br>wR <sub>2</sub> = 0.1202                            |
| Final R indexes [all data]                   | R <sub>1</sub> = 0.0536,<br>wR <sub>2</sub> = 0.1181                          | R <sub>1</sub> = 0.0455,<br>wR <sub>2</sub> = 0.1222                            |
| Largest diff. peak/hole/<br>eÅ <sup>-3</sup> | 0.53/−0.99                                                                    | 1.04/−1.01                                                                      |

**Table S2.** Crystal data and structure refinement parameters for cocrystal *cis*-**A**·½C<sub>6</sub>H<sub>14</sub> and compound *trans*-**A**.

|                                              |                                                                               |                                                                               |
|----------------------------------------------|-------------------------------------------------------------------------------|-------------------------------------------------------------------------------|
| Structure                                    | <i>cis</i> - <b>A</b> ·½C <sub>6</sub> H <sub>14</sub>                        | <i>trans</i> - <b>A</b>                                                       |
| Identification code                          | BSC-242                                                                       | BSC-221                                                                       |
| CCDC number                                  | 2314870                                                                       | 2314867                                                                       |
| Empirical formula                            | C <sub>18</sub> H <sub>17</sub> Cl <sub>2</sub> N <sub>2</sub> O <sub>3</sub> | C <sub>15</sub> H <sub>12</sub> Cl <sub>2</sub> N <sub>2</sub> O <sub>3</sub> |
| Formula weight                               | 380.23                                                                        | 339.17                                                                        |
| Temperature, K                               | 100(2)                                                                        | 100(2)                                                                        |
| Crystal system                               | triclinic                                                                     | triclinic                                                                     |
| Space group                                  | P-1                                                                           | P-1                                                                           |
| a, Å                                         | 7.0450(3)                                                                     | 10.2007(3)                                                                    |
| b, Å                                         | 11.5316(3)                                                                    | 11.1248(3)                                                                    |
| c, Å                                         | 12.0752(4)                                                                    | 14.0504(4)                                                                    |
| α, °                                         | 67.014(3)                                                                     | 73.976(2)                                                                     |
| β, °                                         | 74.958(4)                                                                     | 76.447(2)                                                                     |
| γ, °                                         | 76.945(3)                                                                     | 77.314(2)                                                                     |
| Volume, Å <sup>3</sup>                       | 863.56(6)                                                                     | 1469.21(8)                                                                    |
| Z                                            | 2                                                                             | 4                                                                             |
| ρ <sub>calc</sub> , cm <sup>3</sup>          | 1.462                                                                         | 1.533                                                                         |
| μ, mm <sup>-1</sup>                          | 3.559                                                                         | 4.110                                                                         |
| F(000)                                       | 394.0                                                                         | 696.0                                                                         |
| Crystal size, mm <sup>3</sup>                | 0.19 × 0.18 × 0.15                                                            | 0.12 × 0.11 × 0.1                                                             |
| Radiation                                    | Cu Kα (λ = 1.54184)                                                           | CuKα (λ = 1.54184)                                                            |
| 2θ range for data collection, °              | 8.412 to 141.232                                                              | 6.66 to 142.128                                                               |
| Index ranges                                 | −8 ≤ h ≤ 8,<br>−11 ≤ k ≤ 14,<br>−14 ≤ l ≤ 14                                  | −11 ≤ h ≤ 12,<br>−12 ≤ k ≤ 13,<br>−17 ≤ l ≤ 17                                |
| Reflections collected                        | 9185                                                                          | 15780                                                                         |
| Independent reflections                      | 3278 [R <sub>int</sub> = 0.0340,<br>R <sub>sigma</sub> = 0.0379]              | 5601 [R <sub>int</sub> = 0.0390,<br>R <sub>sigma</sub> = 0.0459]              |
| Data/restraints/parameters                   | 3278/0/227                                                                    | 5601/0/399                                                                    |
| Goodness-of-fit on F <sup>2</sup>            | 1.058                                                                         | 1.071                                                                         |
| Final R indexes [I ≥ 2σ (I)]                 | R <sub>1</sub> = 0.0496,<br>wR <sub>2</sub> = 0.1359                          | R <sub>1</sub> = 0.0400,<br>wR <sub>2</sub> = 0.1019                          |
| Final R indexes [all data]                   | R <sub>1</sub> = 0.0556,<br>wR <sub>2</sub> = 0.1415                          | R <sub>1</sub> = 0.0469,<br>wR <sub>2</sub> = 0.1065                          |
| Largest diff. peak/hole/<br>eÅ <sup>-3</sup> | 0.61/−0.58                                                                    | 0.90/−0.39                                                                    |

## S2. Copies of the NMR spectra of *cis*-A and *trans*-A

$^1\text{H}$  and  $^{13}\text{C}$  spectra of *cis*-A

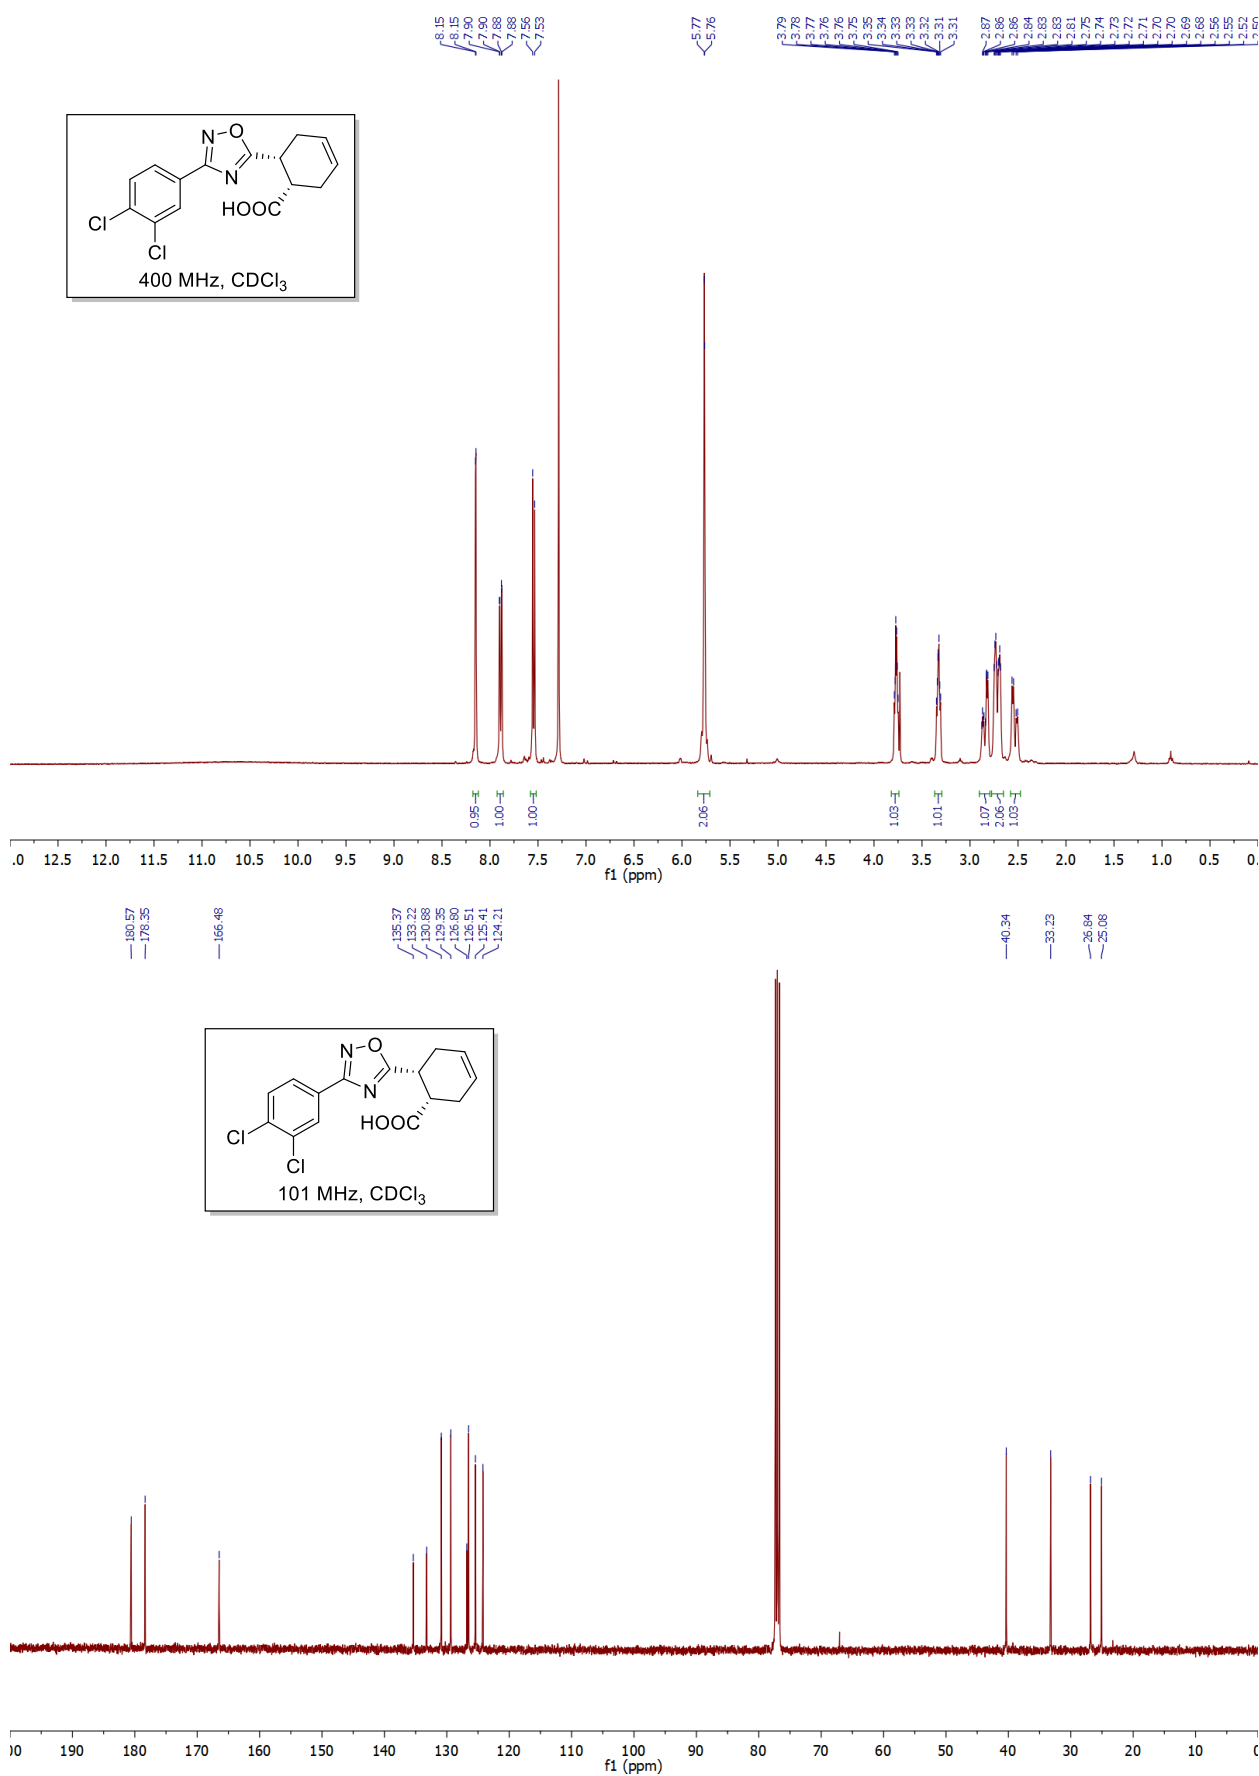

$^1\text{H}$  and  $^{13}\text{C}$  spectra of *trans*-A

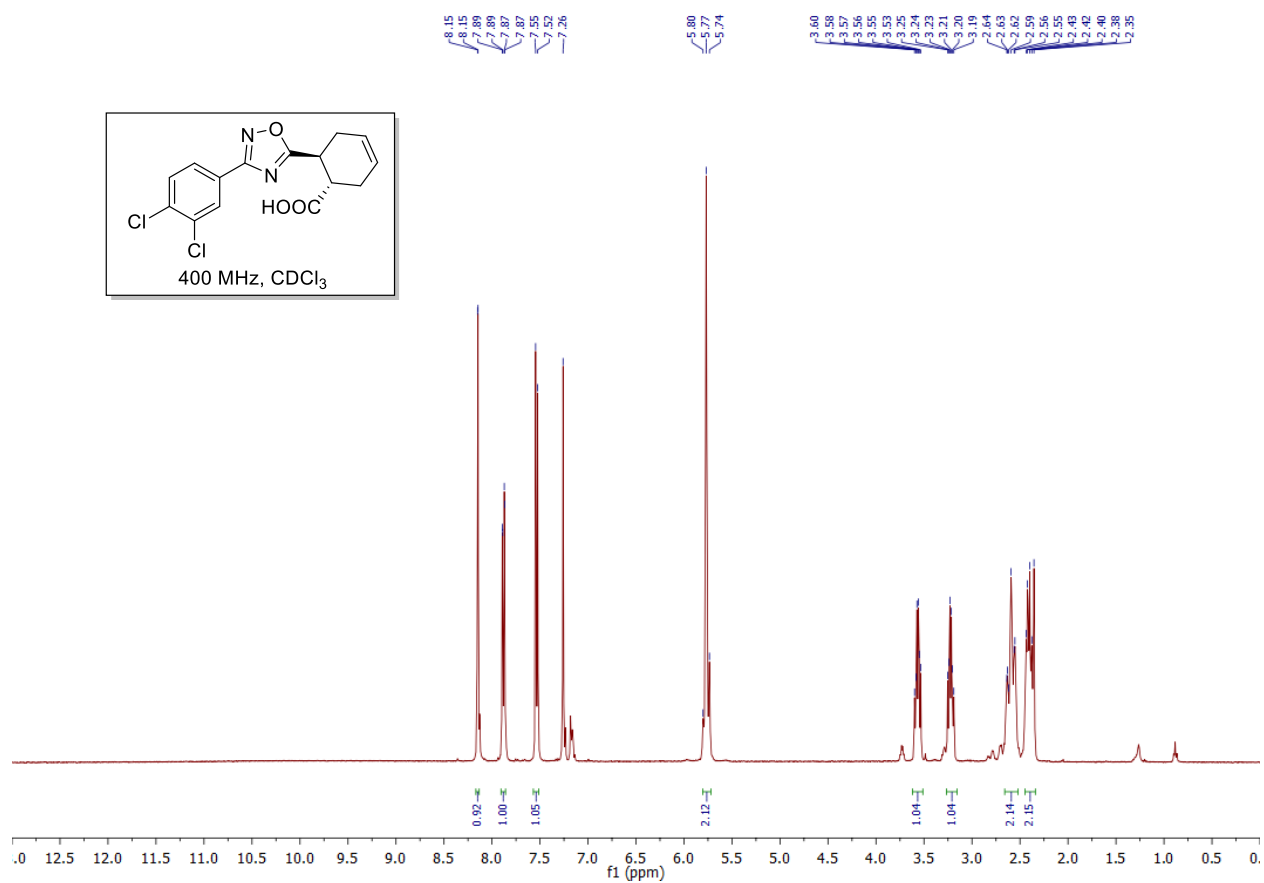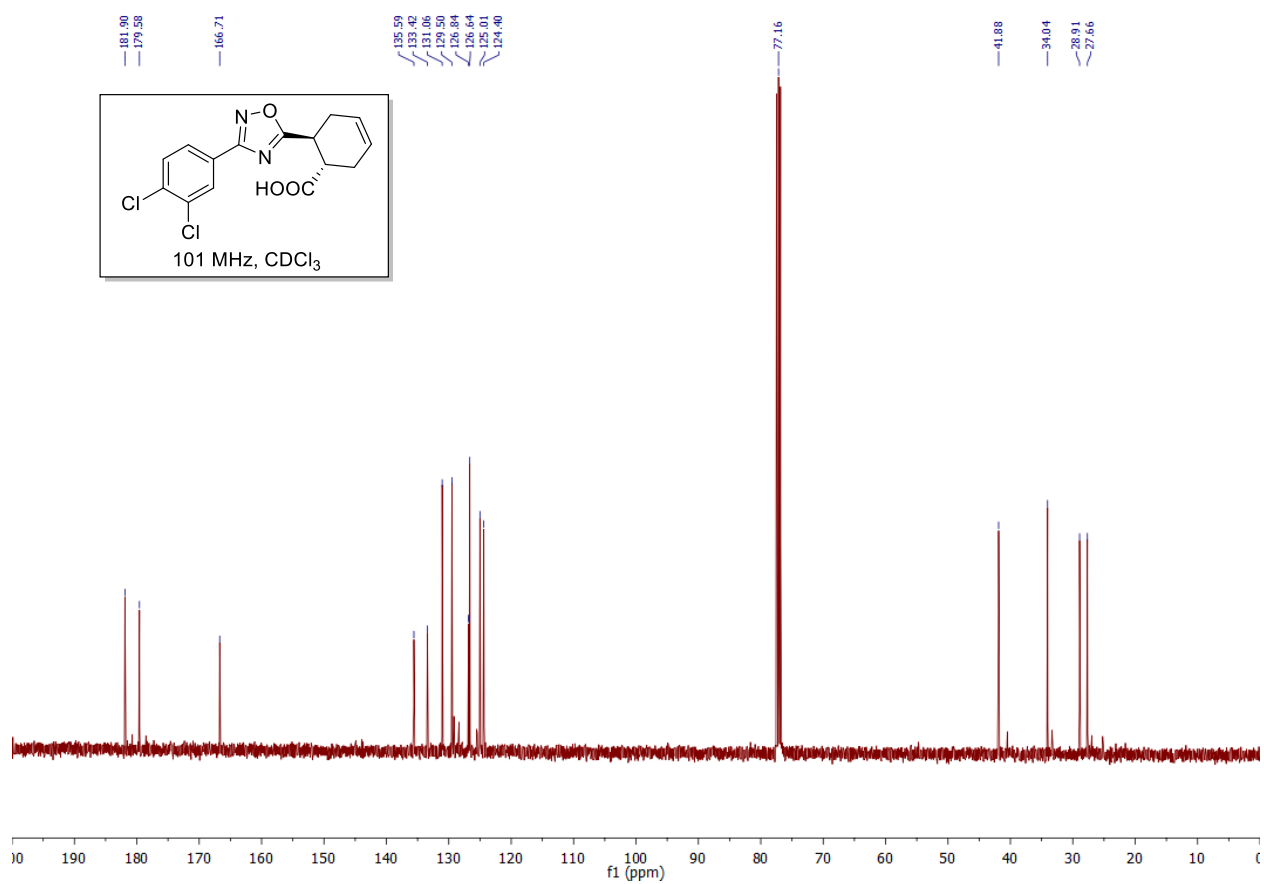

### S3. Noncovalent interactions in the structure of *trans*-A

**Table S3.** Geometrical parameters of hydrogen bonds in the structure of *trans*-A.

| Contact       | d(H···O), Å | d(O···O), Å | ∠(O–H···O), ° | R <sup>a</sup> |
|---------------|-------------|-------------|---------------|----------------|
| O1–H1···O2    | 1.8123(13)  | 2.6512(18)  | 176.51(11)    | 0.67           |
| O1A–H1A···O2A | 1.8174(15)  | 2.656(2)    | 176.73(13)    | 0.67           |

<sup>a</sup>R is interatomic distance to Bondi (*J. Phys. Chem.*, 1964, 68, 441–451)  $\Sigma_{\text{vdW}}$  ratio,  $\Sigma_{\text{vdW}}$  H + O = 2.72 Å.

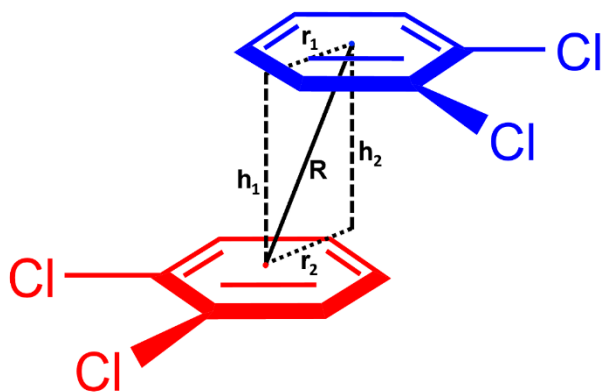

**Table S4.** Geometrical parameters of  $\pi\cdots\pi$  stacking interactions in the structures of *cis*-A·½(1,2-DCE), *cis*-A·½(1,2-DBE), and *cis*-A·½C<sub>6</sub>H<sub>14</sub>.

| Structure                                     | R, Å <sup>a</sup> | h, Å <sup>b</sup> | r, Å <sup>c</sup> | $\phi$ , ° <sup>d</sup> | $\theta$ , ° <sup>e</sup> |
|-----------------------------------------------|-------------------|-------------------|-------------------|-------------------------|---------------------------|
| <i>cis</i> -A·½(1,2-DCE)                      | 3.5964(13)        | 3.4358(15)        | 1.063(3)          | 0.000(7)                | 0.00(1)                   |
| <i>cis</i> -A·½(1,2-DBE)                      | 3.602(4)          | 3.394(4)          | 1.204(7)          | 0.00(2)                 | 0.000(18)                 |
| <i>cis</i> -A·½C <sub>6</sub> H <sub>14</sub> | 3.6364(16)        | 3.4134(18)        | 1.254(3)          | 0.0(1)                  | 0.00(7)                   |

<sup>a</sup>R, distance between the centroid of one ring and the centroid of a  $\pi\cdots\pi$  stacked ring;

<sup>b</sup>h<sub>1</sub> and h<sub>2</sub>, distance between the centroid of one ring and the plane of a  $\pi\cdots\pi$  stacked ring;

<sup>c</sup>r<sub>1</sub> and r<sub>2</sub>, distance between the centroid of one ring and the projection of the centroid of a  $\pi\cdots\pi$  stacked ring to the first plane (rings offset);

<sup>d</sup> $\phi$ , twist angle is defined as the angle between the plane of the anchoring ring and the plane containing six atoms of aromatic ring;

<sup>e</sup> $\theta$ , angle between planes of adjacent  $\pi\cdots\pi$  stacked ring.

**Table S5.** Geometrical parameters of  $\pi\cdots\pi$  stacking interactions in the structure of *trans*-A.

| Plane <sup>a</sup>      | R, Å <sup>b</sup> | h <sub>1</sub> , Å <sup>c</sup> | h <sub>2</sub> , Å <sup>c</sup> | r <sub>1</sub> , Å <sup>d</sup> | r <sub>2</sub> , Å <sup>d</sup> | $\phi$ , ° <sup>e</sup> | $\theta$ , ° <sup>f</sup> |
|-------------------------|-------------------|---------------------------------|---------------------------------|---------------------------------|---------------------------------|-------------------------|---------------------------|
| Cg <sup>f</sup> 1···Cg1 | 3.6239(17)        | 3.365(2)                        | -3.365(2)                       | 1.345(3)                        | 1.345(3)                        | 0.0(3)                  | 0.00                      |
| Cg2···Cg2               | 3.9102(16)        | 3.468(2)                        | -3.468(2)                       | 1.807(3)                        | 1.807(3)                        | 180.0(3)                | 180.0(2)                  |
| Cg1···Cg2               | 3.6313(12)        | 3.5891(12)                      | -3.5435(13)                     | 0.552(3)                        | 0.794(3)                        | 120.6(4)                | 168.81(7)                 |

<sup>a</sup>Cg are planes of the 3,4-dichlorophenyl moieties (**Figure 5**).

<sup>b</sup>R, distance between the centroid of one ring and the centroid of a  $\pi\cdots\pi$  stacked ring;

<sup>c</sup>h<sub>1</sub> and h<sub>2</sub>, distance between the centroid of one ring and the plane of a  $\pi\cdots\pi$  stacked ring;

<sup>d</sup>r<sub>1</sub> and r<sub>2</sub>, distance between the centroid of one ring and the projection of the centroid of a  $\pi\cdots\pi$  stacked ring to the first plane (rings offset);

<sup>e</sup> $\phi$ , twist angle is defined as the angle between the plane of the anchoring ring and the plane containing six atoms of aromatic ring;

<sup>f</sup> $\theta$ , angle between planes of adjacent  $\pi\cdots\pi$  stacked ring.

S4. Void channels in structures of *cis*-A·½(1,2-DBE) and *cis*-A·½C<sub>6</sub>H<sub>14</sub>

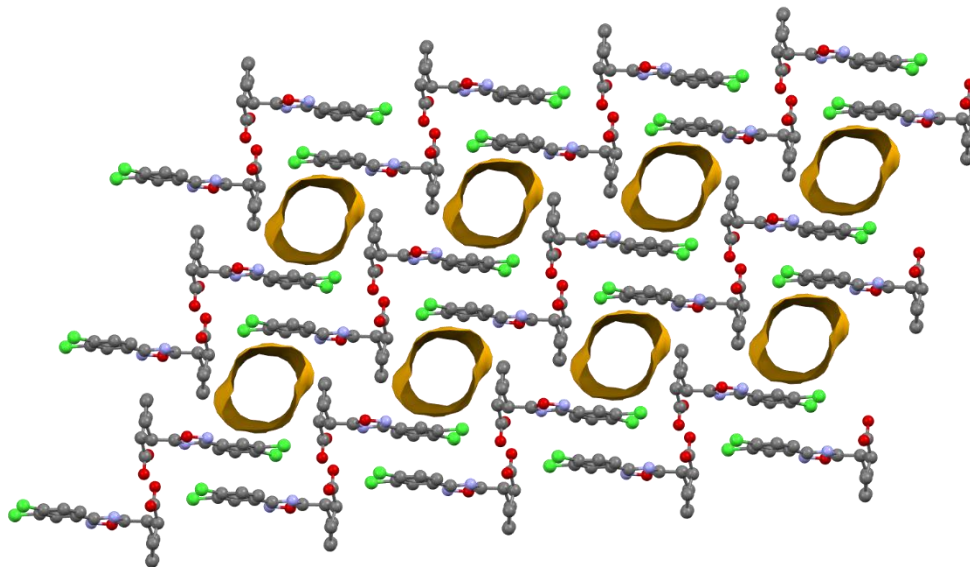

**Figure S1.** Partial representation (Mercury 4.3.1, ball and stick) of the crystal packing of *cis*-A·½(1,2-DBE) after orientations evidencing the cylindrical shape and the parallel arrangement of the channels (contact surfaces in ocher). A probe radius of 1.2 Å and an approximate grid spacing of 0.7 Å were used to generate channels. Solvent molecules in the voids and H-atoms are omitted for the sake of clarity. Color coding: grey, carbon; red, oxygen; blue, nitrogen; green, chlorine.

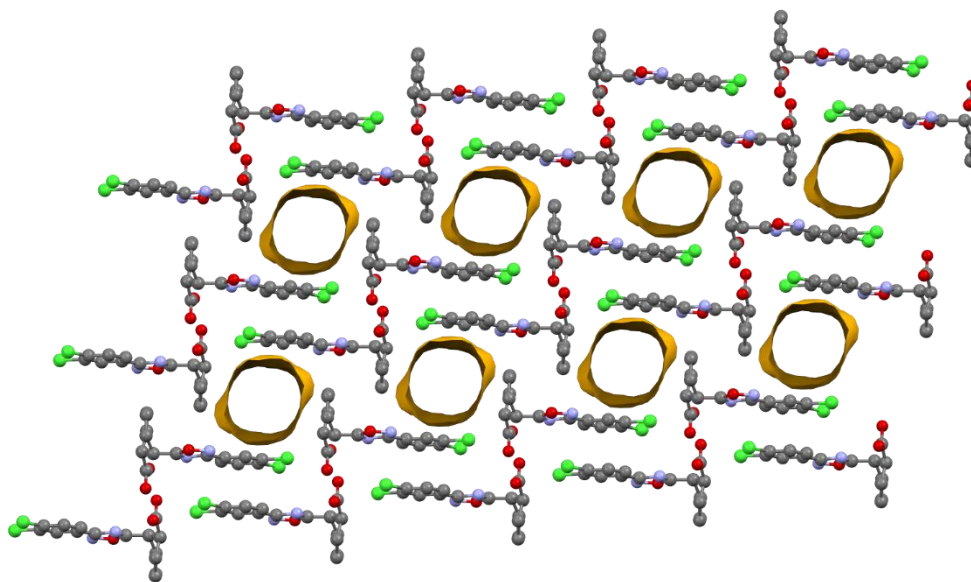

**Figure S2.** Partial representation (Mercury 4.3.1, ball and stick) of the crystal packing of *cis*-A·½C<sub>6</sub>H<sub>14</sub> after orientations evidencing the cylindrical shape and the parallel arrangement of the channels (contact surfaces in ocher). A probe radius of 1.2 Å and an approximate grid spacing of 0.7 Å were used to generate channels. Solvent molecules in the voids and H-atoms are omitted for the sake of clarity. Color coding: grey, carbon; red, oxygen; blue, nitrogen; green, chlorine.
